# Supplementary material
Source: PubMed Central journal article supplement (PMC6124691)
Supplement: NIHMS1500107-supplement-8.pdf [file NIHMS1500107-supplement-8.pdf]

**Table S1 EM data and refinement, related to Figure 3**

|                                           | Overall                              | Composite Model*      | Core   | DIS3-PIN | DIS3-RNBCS | MTR4   | MTR4-dsDNA/RNA |
|-------------------------------------------|--------------------------------------|-----------------------|--------|----------|------------|--------|----------------|
| <b>Data collection</b>                    |                                      |                       |        |          |            |        |                |
| Particles                                 | 122284                               |                       | 122284 | 122284   | 91483      | 122284 | 33967          |
| Pixel size                                | 1.07 Å/px                            |                       |        |          |            |        |                |
| Defocus range (µM)                        | -1.0 to -3.0                         |                       |        |          |            |        |                |
| Voltage (kV)                              | 300                                  |                       |        |          |            |        |                |
| Electron dose (Å)                         | 85.23 e <sup>-</sup> /Å <sup>2</sup> |                       |        |          |            |        |                |
| <b>Reconstruction (RELION)</b>            |                                      |                       |        |          |            |        |                |
| Accuracy of rotations (°)                 | 1.35                                 |                       | 2.07   | 1.65     | 1.40       | 1.47   | 1.82           |
| Accuracy of translations (pixel)          | 0.81                                 |                       | 0.88   | 0.78     | 1.04       | 0.98   | 1.34           |
| Resolution (Å)                            | 3.45                                 |                       | 3.31   | 3.40     | 3.80       | 3.54   | 3.91           |
| Map sharpening B-factor (Å <sup>2</sup> ) | 73.6                                 |                       | 47.4   | 64.3     | 90.6       | 82.1   | 84.0           |
| <b>Model composition</b>                  |                                      |                       |        |          |            |        |                |
| Non-hydrogen atoms                        | 31633                                | 31633                 | 17826  | 1817     | 5469       | 6623   | 6623           |
| Protein residues                          | 3889                                 | 3889                  | 2310   | 212      | 647        | 726    | 726            |
| Nucleic acid residues                     | 59                                   | 59                    | 5      | 8        | 14         | 37     | 37             |
| <b>Refinement</b>                         |                                      |                       |        |          |            |        |                |
| Map CC (around atoms)                     | 0.738                                |                       | 0.754  | 0.688    | 0.744      | 0.729  | 0.741          |
| FSC (map,model)=0.143 (Å)                 | 3.39                                 |                       | 3.25   | 3.33     | 3.66       | 3.46   | 3.79           |
| FSC (map,model)=0.5 (Å)                   | 3.62                                 |                       | 3.40   | 4.04     | 3.95       | 3.77   | 4.06           |
| <b>RMS deviations</b>                     |                                      |                       |        |          |            |        |                |
| Bond lengths (Å)                          | 0.006                                | 0.001                 |        |          |            |        |                |
| Bond angles (°)                           | 0.748                                | 0.41                  |        |          |            |        |                |
| <b>Validation</b>                         |                                      |                       |        |          |            |        |                |
| Molprobity score/Percentile               | 2.06/73 <sup>rd</sup>                | 2.03/74 <sup>th</sup> |        |          |            |        |                |
| Clashscore/Percentile                     | 9.78/73 <sup>rd</sup>                | 9.1/77 <sup>th</sup>  |        |          |            |        |                |
| Rotamer Outliers (%)                      | 0.06                                 | 0.03                  |        |          |            |        |                |
| C-beta deviations                         | 0                                    | 0                     |        |          |            |        |                |
| <b>Ramachandran plot</b>                  |                                      |                       |        |          |            |        |                |
| % favored                                 | 90.1                                 | 90.0                  |        |          |            |        |                |
| % allowed                                 | 9.9                                  | 10.0                  |        |          |            |        |                |
| % outliers                                | 0.0                                  | 0.0                   |        |          |            |        |                |

\* Composite model generated by combining respective coordinates from each refinement in focused maps.

**Table S2 Oligonucleotides used in this study, related to Key Resources Table**

| Type                                         | Sequence 5' to 3'                                                                                            | Source    |
|----------------------------------------------|--------------------------------------------------------------------------------------------------------------|-----------|
| RNA                                          | Fluorescein-AGC ACC GUA AAG ACG C                                                                            | IDT       |
| RNA                                          | GCG UCU UUA CGG UGC UAA AAA AAA AAA AAA AAA AAA                                                              | IDT       |
| RNA                                          | AGC ACC GUA AAG ACG C                                                                                        | Dharmacon |
| RNA                                          | Fluorescein-GCG UCU UUA CGG UGC UCA CCA CAC CAC ACC ACA CCA CAC CAC ACC ACA CCA CAC AAA AAA AA               | Dharmacon |
| RNA-DNA chimera (DNA underlined)             | <u>GCG UCU UUA CGG UGC UAA AAA AAA AAA AAA AAA AAA</u>                                                       | Dharmacon |
| RNA-DNA chimera (DNA underlined)             | Fluorescein-GCG <u>TCT TTA CGG TGC T CA CCA CAC CAC ACC</u> ACA CCA CAC CAC ACC ACA CCA CAC AAA AAA AA       | Dharmacon |
| RNA-DNA chimera (DNA underlined)             | <u>GCG TCT TTA CGG TGC T CA CCA CAC CAC ACC</u> ACA CCA CAC CAC ACC ACA CCA CAC AAA AAA AA                   | Dharmacon |
| 4SU-labeled RNA-DNA chimera (DNA underlined) | Fluorescein-GCG <u>TCT TTA CGG TGC TAA AAA AAA AAA AAA</u> AAA A(4SU)A                                       | Dharmacon |
| 4SU-labeled RNA-DNA chimera (DNA underlined) | Fluorescein-GCG <u>TCT TTA CGG TGC TAA AAA AAA AA</u> (4SU) AAA AAA AAA                                      | Dharmacon |
| 4SU-labeled RNA-DNA chimera (DNA underlined) | Fluorescein-GCG <u>TCT TTA CGG TGC TAA AAA</u> (4SU)AA AAA AAA AAA AAA                                       | Dharmacon |
| 4SU-labeled RNA-DNA chimera (DNA underlined) | Fluorescein-GCG <u>TCT TTA CGG TGC T</u> (4SU)A AAA AAA AAA AAA AAA AAA                                      | Dharmacon |
| 4SU-labeled RNA-DNA chimera (DNA underlined) | Fluorescein-GCG <u>TCT TTA CGG TGC T CAC ACC ACA CCA</u> CAC CAC ACA AAA AA(4SU) A                           | Dharmacon |
| 4SU-labeled RNA-DNA chimera (DNA underlined) | Fluorescein-GCG <u>TCT TTA CGG TGC T CAC CAC ACC ACA</u> CCA CAC CAC ACC ACA CCA CAC CAC ACA AAA AA(4-S-U) A | Dharmacon |
| DNA                                          | <u>GTG TGG TGT GGT GTG GTG TGG TGT GGT GTG GTG TGG T</u>                                                     | IDT       |
| DNA                                          | Fluorescein- <u>GTG TGG TGT GGT GTG GTG TGG TGT GGT GTG GTG TGG T</u>                                        | Dharmacon |
| DNA                                          | <u>TTT TTT TTT TT</u>                                                                                        | IDT       |
| DNA                                          | <u>TTA TTT TTT TT</u>                                                                                        | IDT       |
| DNA                                          | <u>TTT TTT ATT TT</u>                                                                                        | IDT       |
| DNA                                          | <u>GTG TGG TGT GGT GTG GT GT</u>                                                                             | IDT       |
| DNA                                          | <u>GCGTCTTACGGTGCT</u>                                                                                       | IDT       |
| DNA                                          | <u>ACCACACCACACCACAC</u>                                                                                     | IDT       |
